# Supplementary material for: A novel chemodosimeter for fluoride ions based on deprotonation of the C–H group followed by an autoxidative decyanation process
Source: Royal Society of Chemistry journal article supplement (doi:10.1039/c3cc46065g), 2013-01-01
Supplement: c3cc46065g.pdf [file c3cc46065g.pdf]

## Supporting Information for

# A novel chemodosimeter for fluoride ion based on deprotonation of the C-H group followed by autoxidative decyanation process

Jinju Chen, Chuanxiang Liu\*, Jiali Zhang, Min Zhou and Fanhong Wu\*

School of Chemical and Environmental Engineering, Shanghai Institute of Technology, 201418 Shanghai, China

E-mail: [cxliu@sit.edu.cn](mailto:cxliu@sit.edu.cn), [wfh@sit.edu.cn](mailto:wfh@sit.edu.cn)

## Contents of Supporting Information

|                                                                                                                                                                            |        |
|----------------------------------------------------------------------------------------------------------------------------------------------------------------------------|--------|
| 1. General methods.....                                                                                                                                                    | S2     |
| 2. Synthesis and characterization of compounds <b>2</b> , <b>4</b> and <b>5</b> .....                                                                                      | S2-S4  |
| 3. <sup>1</sup> H-NMR spectrum of the compound <b>2</b> (Figures S1 ).....                                                                                                 | S5     |
| 4. <sup>1</sup> H-NMR, <sup>13</sup> C-NMR, IR and HRMS-ESI spectrum of the compound <b>4</b> (Figures S2-S5).....                                                         | S6-S8  |
| 5. <sup>1</sup> H-NMR, <sup>13</sup> C-NMR, IR and HRMS-ESI spectrum of the compound <b>5</b> (Figures S6-S9).....                                                         | S9-S11 |
| 6. UV-visible titration of compound <b>4</b> with AcO <sup>-</sup> in CH <sub>3</sub> CN (Figure S10).....                                                                 | S12    |
| 7. UV-visible titration of compound <b>4</b> with H <sub>2</sub> PO <sub>4</sub> <sup>-</sup> in CH <sub>3</sub> CN (Figure S11).....                                      | S13    |
| 8. The absorbance detection limit of the <b>4</b> with F <sup>-</sup> in CH <sub>3</sub> CN (Figure S12).....                                                              | S14    |
| 9. The standard 1:1 curve-fitting procedures for binding constants of F <sup>-</sup> , AcO <sup>-</sup> and H <sub>2</sub> PO <sub>4</sub> <sup>-</sup> (Figures S13)..... | S15    |
| 10. Time-dependence UV- visible spectra of compound <b>4</b> with F <sup>-</sup> (Figure S14).....                                                                         | S16    |
| 11. UV-visible titration of compound <b>4</b> with F <sup>-</sup> in CH <sub>3</sub> CN (Figure S15).....                                                                  | S17    |
| 12. The final state of compound <b>4</b> with F <sup>-</sup> and the UV-visible spectrum of compound <b>5</b> (Figure S16).....                                            | S18    |
| 13. UV-visible titration of compound <b>4</b> with OH <sup>-</sup> in CH <sub>3</sub> CN (Figure S17) .....                                                                | S19    |
| 14. UV-visible titration of compound <b>4</b> with F <sup>-</sup> in mixture of solvent (Figures S18).....                                                                 | S20    |
| 15. Fluorescence titrations of compound <b>4</b> with F <sup>-</sup> in CH <sub>3</sub> CN (Figure S19).....                                                               | S21    |
| 16. HRMS-ESI mass spectrum after the <sup>1</sup> H-NMR titration of compound <b>4</b> with F <sup>-</sup> in CDCl <sub>3</sub> (Figure S20).....                          | S22    |

## 1. General methods.

All chemicals were obtained from commercial suppliers and used without further purification. Toluene were distilled from  $\text{CaH}_2$  prior to use. Melting points were determined using melting point apparatus (WRS-2A) and uncorrected. Flash chromatography was carried out on silica gel (200 – 300 mesh). Analytical TLC was performed on Haiyang ready-to-use plates with silica gel 60 ( $F_{254}$ ).  $^1\text{H}$  NMR and  $^{13}\text{C}$  NMR spectra were recorded on Bruker AVANCE III 500 MHz (operating at 500 MHz for  $^1\text{H}$  NMR and 125 MHz for  $^{13}\text{C}$  NMR) in  $\text{CDCl}_3$  with tetramethylsilane as internal standard. HRMS were recorded on solanX 70 FT-MS spectrometer with methanol and water ( $v/v=1:1$ ) as solvent. IR were recorded on NICOLET 6700 FT-IR. UV-visible absorption spectra were determined on a SHIMADZU UV-1800 spectrophotometer. Fluorescence spectra were determined on a VARIAN CARY Eclipse Fluorescence spectrophotometer. Multiplicities of signals are described as follows: s --- singlet, br. s --- broad singlet, d --- doublet, t --- triplet, m --- multiplet. Coupling constants ( $J$ ) are given in Hz.

## 2. Synthesis and characterization of compounds 2, 4 and 5

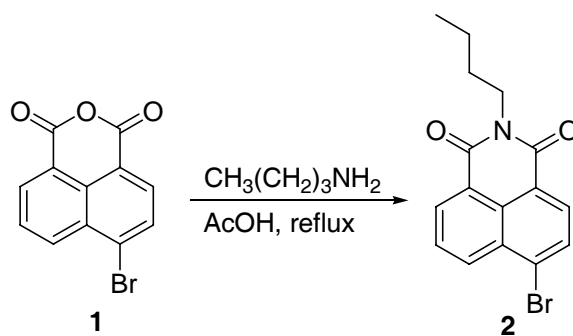

**4-Bromo-N-butyl-1,8-naphthalimide (2)** was synthesized according to the literature reported procedure<sup>1</sup>.

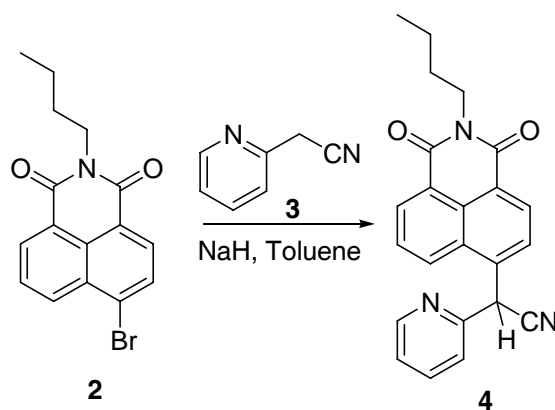

**Synthesis of 2-(N-butyl-1,8-naphthalimide)-2-(pyridin-2-yl)acetonitrile (**4**)<sup>2</sup>:** Sodium hydride (60 w% in oil, 0.65 g, 16.30 mmol) was added to a solution of 2-cyanomethylpyridine (**3**, 0.50 g, 4.20 mmol) under N<sub>2</sub> in toluene (30 mL), and the mixture was stirred at room temperature for 1h. After adding compound **2** (1.00g, 3.00 mmol), the mixture was refluxed under N<sub>2</sub> for 3 h . After cooling at room temperature, the reaction mixture was added with 15% hydrochloric acid until PH = 2~3 , then extraction with ethyl acetate (20 ml × 3), then the organic layer was washed with brine , dried with Na<sub>2</sub>SO<sub>4</sub> and filtered. After concentration of solvent, the residue was purified via chromatography with silica gel ( PE : EA = 15 : 1 ) to afford the target **4** (0.45 g, 66%) as a red-violet solid. mp 140.7-140.8 °C; <sup>1</sup>H NMR (500 MHz, CDCl<sub>3</sub>) δ 8.59 (d, *J* = 7.5, 1H), 8.54 (d, *J* = 6.5 Hz, 2H), 8.39 (d, *J* = 8.5 Hz, 1H), 7.98(d, *J* = 7.5 Hz, 1H), 7.70 (dd, *J* = 8.5,7.5, Hz, 1H), 7.62 (td, *J* = 8.0 ,1.5Hz, 1H), 7.30 (d, *J* = 8.0 Hz, 1H), 7.20 (dd, *J* = 7.5, 5.5 Hz, 1H), 6.01 (s, 1H), 4.10 (t, *J* = 7.5 Hz, 2H), 1.63 (m, 2H), 1.37 (m, 2H), 0.90 (t, *J* = 7.0Hz, 3H); <sup>13</sup>C NMR (125 MHz, CDCl<sub>3</sub>) δ 163.81, 163.50, 154.25, 150.15, 137.80, 136.99, 131.38, 130.86, 129.62, 129.01, 128.90, 127.81, 127.52, 123.72, 123.62, 123.58, 122.30, 118.13, 43.43, 40.36, 30.17, 20.35, 13.79; IR (neat): ν<sub>max</sub> = 2961, 2933, 2874, 2245 (-C≡N), 1760, 1692, 1651, 1615, 1585, 1473, 1438, 1388, 1370, 1350, 1233, 1084, 953, 863, 784, 767, 760, 749, 695 cm<sup>-1</sup>; HRMS-ESI (*m/z*): [M + H]<sup>+</sup> Calcd. for (C<sub>23</sub>H<sub>19</sub>N<sub>3</sub>O<sub>2</sub>), 370.15555, Found:370.15634.

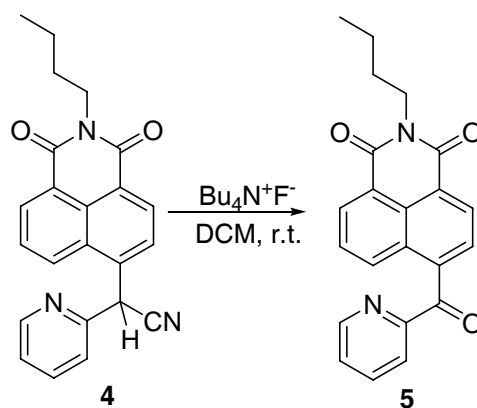

**Synthesis of N-butyl-1,8-naphthalimide-1-yl(pyridin-2-yl)methanone (5):** The mixture of compound **4** (0.04 g, 0.18 mmol) and tetrabutylammonium fluoride (2.00 g, 7.70 mmol) in dichloromethane was stirred at room temperature. After the completion of reaction, the reaction liquid was evaporated to dryness under reduced pressure. The residue was purified by chromatography with silica gel (PE : EA = 10 : 1 ) to afford the target **5** (0.035 g , 90 %). mp 116.6-116.8°C;  $^1\text{H}$  NMR (500 MHz,  $\text{CDCl}_3$ )  $\delta$  8.58 (m, 3H), 8.31 (d,  $J$  = 8.5 Hz, 1H), 8.25 (d,  $J$  = 8.0 Hz, 1H), 7.93 (td,  $J$  = 8.0, 2.0 Hz, 1H), 7.85 (t,  $J$  = 7.5, Hz, 1H), 7.68 (dd,  $J$  = 8.5, 7.5 Hz, 1H), 7.48 (ddd,  $J$  = 6.0, 4.5, 1.0 Hz, 1H), 4.14 (t,  $J$  = 7.5 Hz, 2H), 1.66 (m, 2H), 1.39 (m, 2H), 0.92 (t,  $J$  = 7.5 Hz, 3H);  $^{13}\text{C}$  NMR (125 MHz,  $\text{CDCl}_3$ )  $\delta$  195.66, 164.02, 163.67, 154.13, 149.34, 140.84, 137.31, 131.86, 131.40, 129.64, 129.57, 128.89, 128.50, 127.81, 127.41, 124.71, 124.36, 122.95, 40.37, 30.20, 20.37, 13.83; IR (neat):  $\nu_{\text{max}}$  = 2955, 2924, 2853, 1697, 1678, 1657, 1616, 1593, 1578, 1439, 1438, 1407, 1370, 1355, 1329, 1233, 1086, 859, 781, 760, 749, 712, 689  $\text{cm}^{-1}$ ; HRMS-ESI ( $m/z$ ):  $[\text{M} + \text{H}]^+$  Calcd. for ( $\text{C}_{22}\text{H}_{18}\text{N}_2\text{O}_3$ ), 359.13957, Found: 359.14028.

## Reference:

- (1) L. Song, Y. Yang, Q. Zhang, H. Tian and W. Zhu, *J. Phys. Chem. B*, 2011, **115**, 14648.
- (2) (a) Y. Kubota, T. Tsuzuki, K. Funabiki, M. Ebihara and M. Matsui, *Org. Lett.* 2010, **12**, 4010;  
(b) G. R. Newkome, Y. J. Joo, D. W. Evans, S. Pappalardo and F. R. Fronczek, *J. Org. Chem.* 1988, **53**, 786.

### 3. $^1\text{H}$ -NMR spectrum of the compound 2.

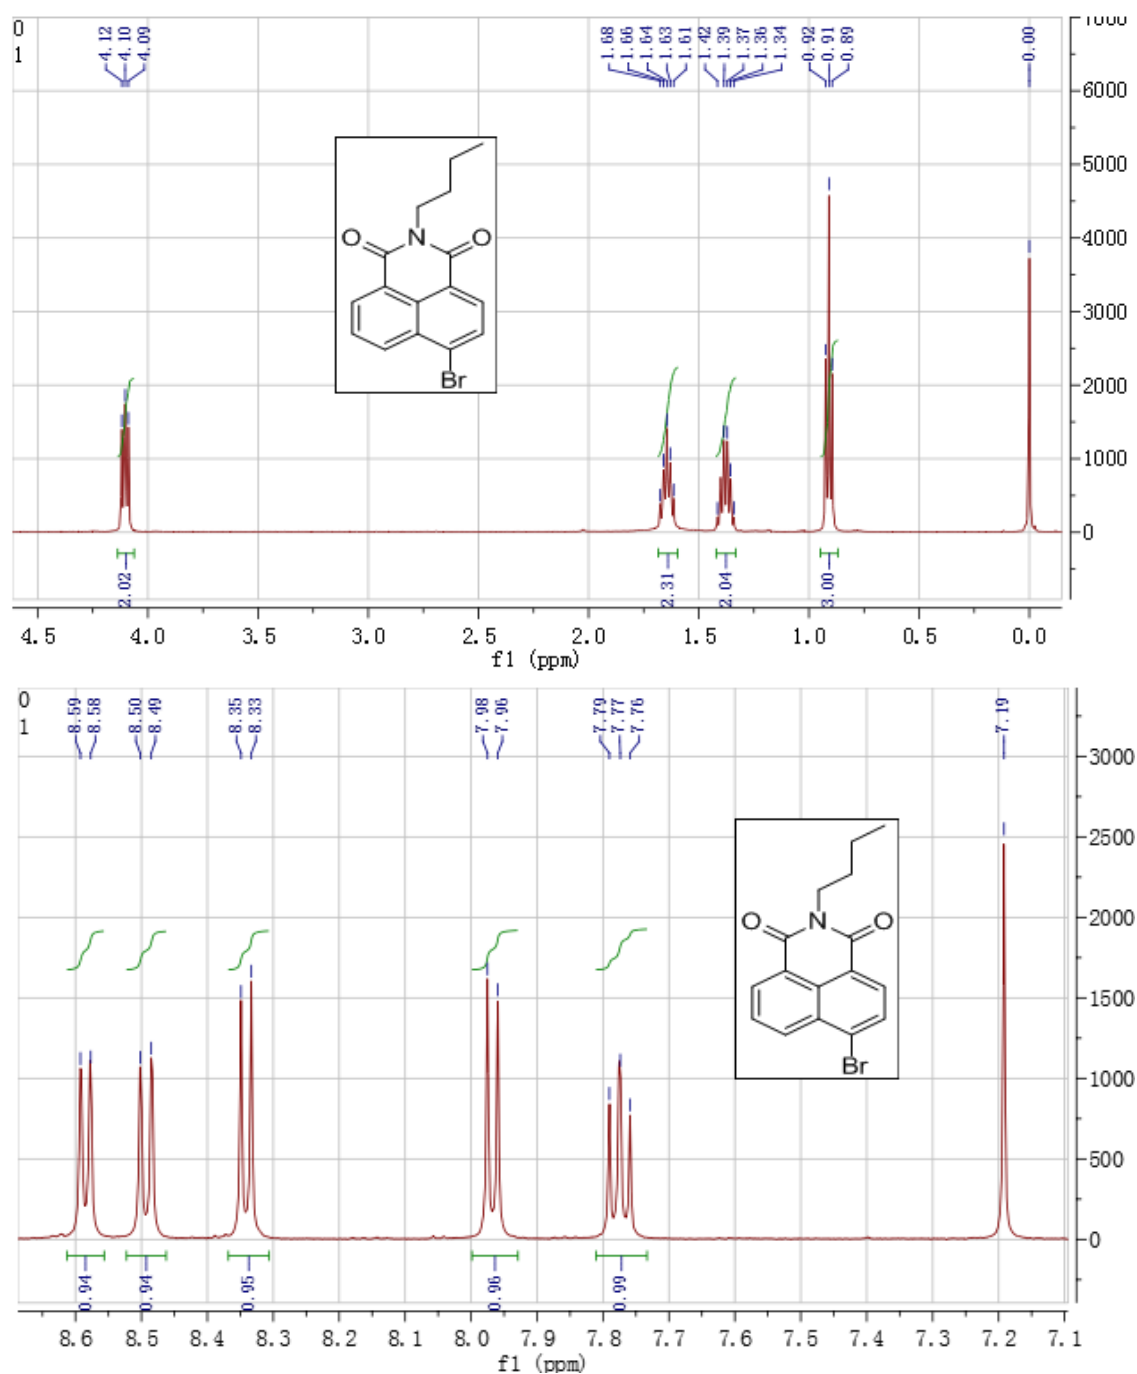

**Figure S1.**  $^1\text{H}$ -NMR ( $\text{CDCl}_3$ , 500 MHz) spectrum of compound 2

4.  $^1\text{H}$ -NMR,  $^{13}\text{C}$ -NMR, IR and HRMS-ESI spectrum of the compound 4.

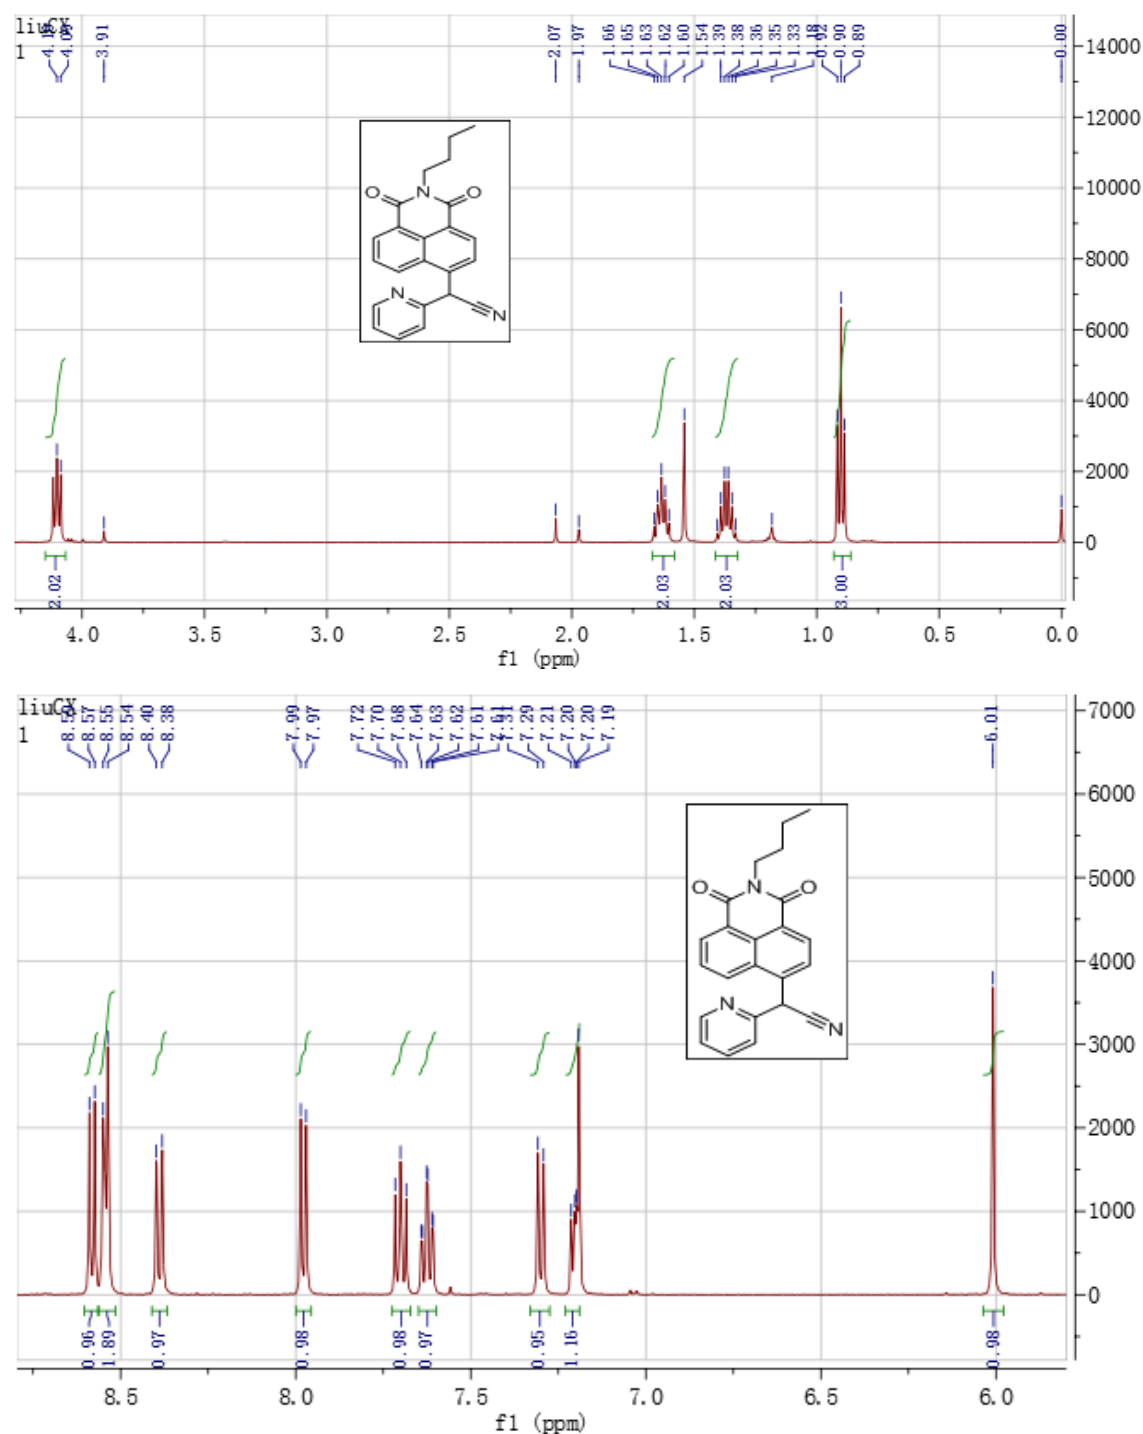

Figure S2.  $^1\text{H}$ -NMR ( $\text{CDCl}_3$ , 500 MHz) spectrum of compound 4

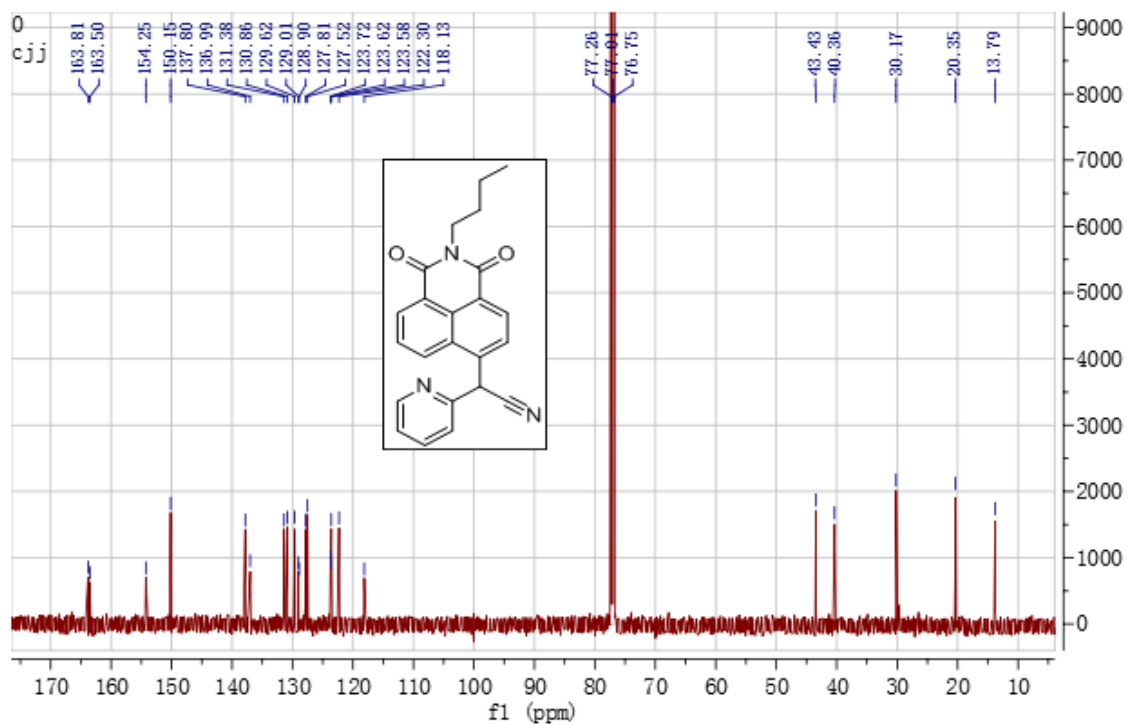

Figure S3. <sup>13</sup>C-NMR (CDCl<sub>3</sub>, 125 MHz) spectrum of compound 4

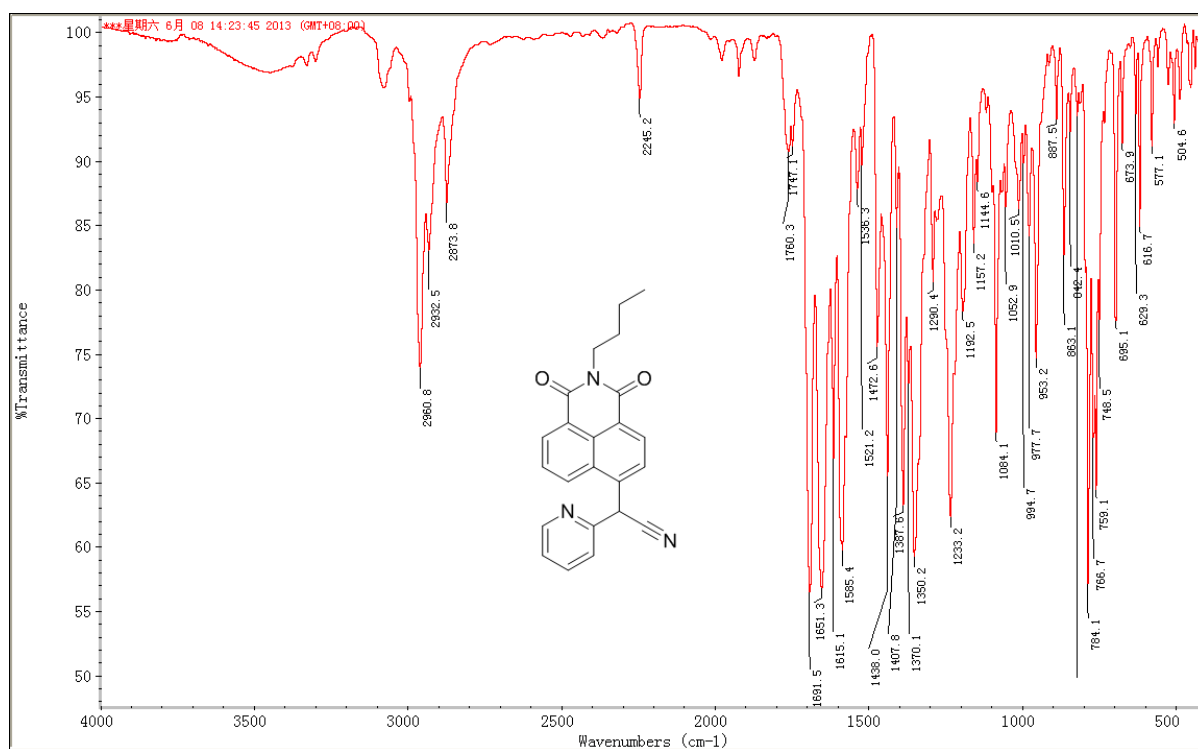

Figure S4. IR spectrum of compound 4

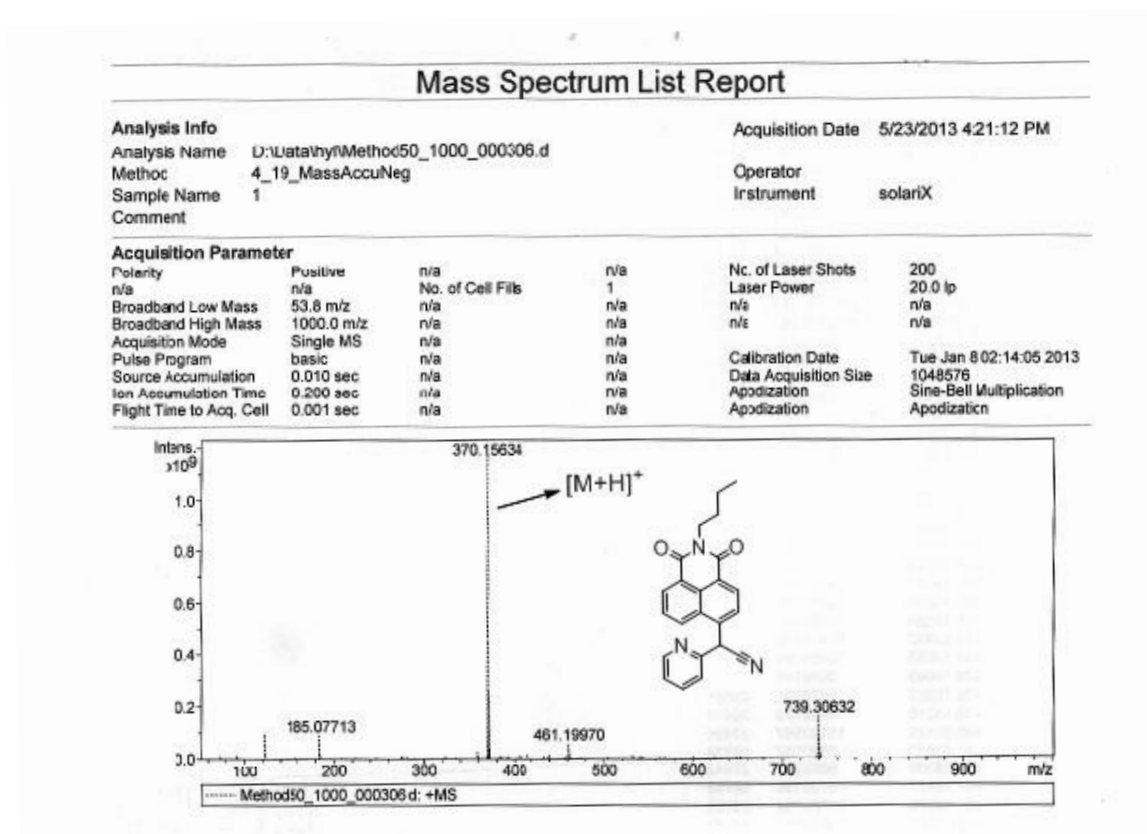

Figure S5. HRMS-ESI mass spectrum of compound 4



5.  $^1\text{H}$ -NMR,  $^{13}\text{C}$ -NMR, IR and HRMS-ESI spectrum of the compound 5.

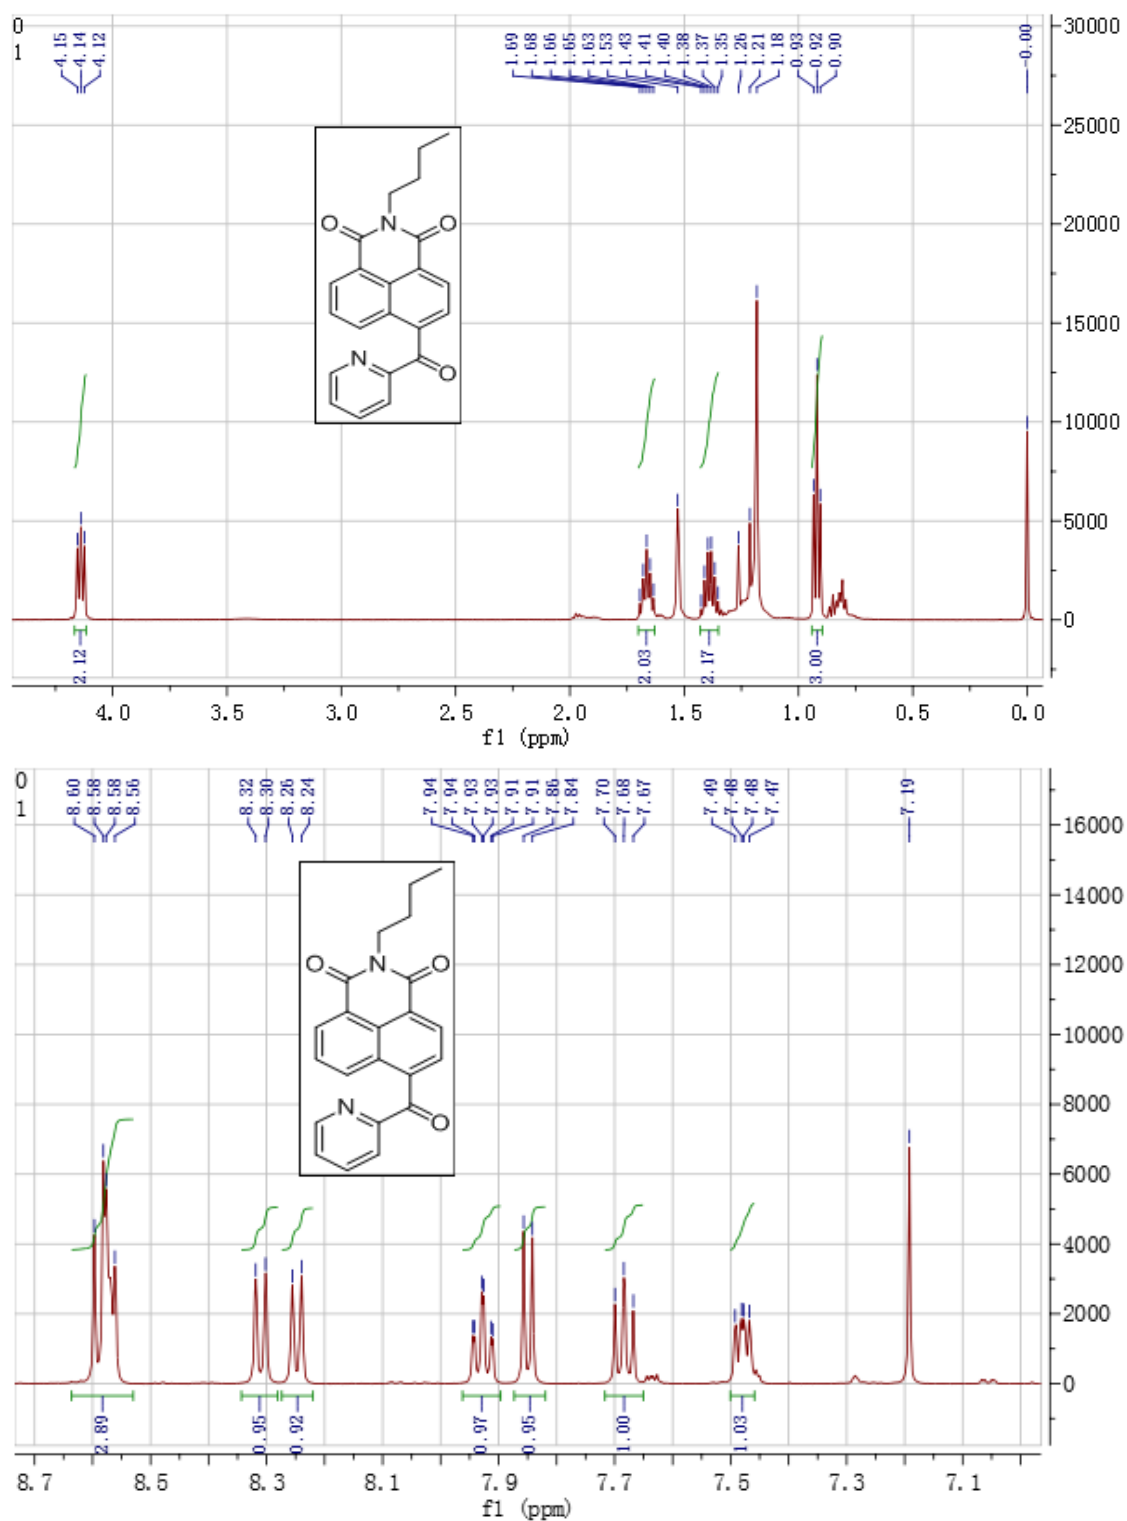

Figure S6.  $^1\text{H}$ -NMR( $\text{CDCl}_3$ , 500 MHz) spectrum of compound 5

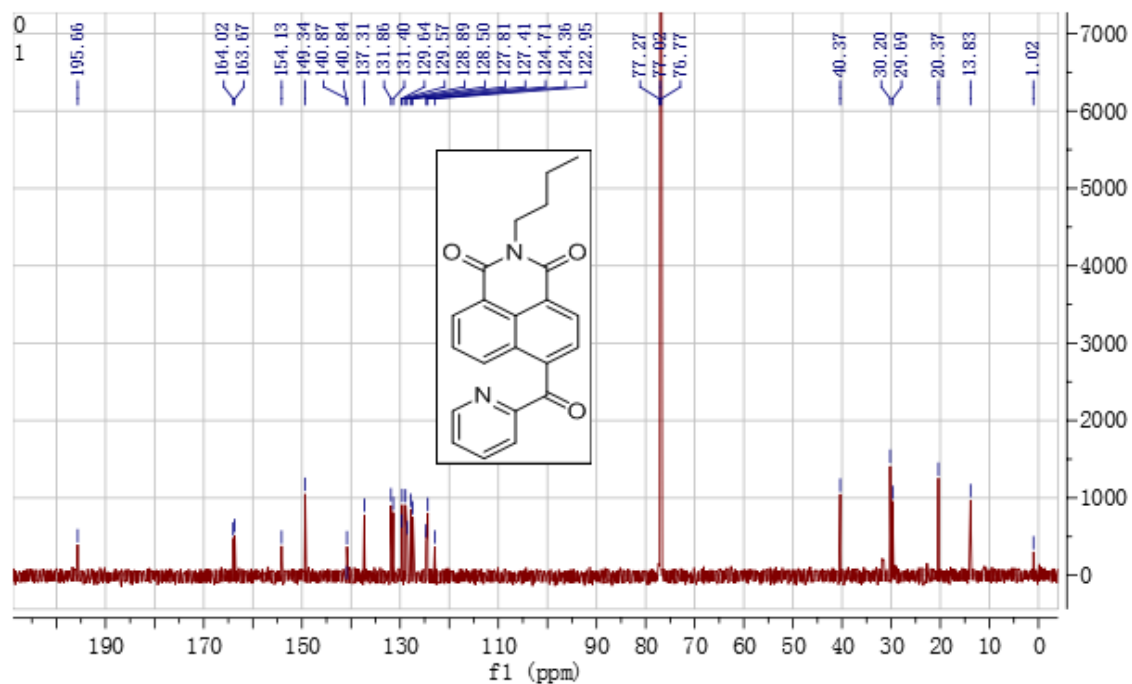

Figure S7. <sup>13</sup>C-NMR (CDCl<sub>3</sub>, 125 MHz) spectrum of compound 5

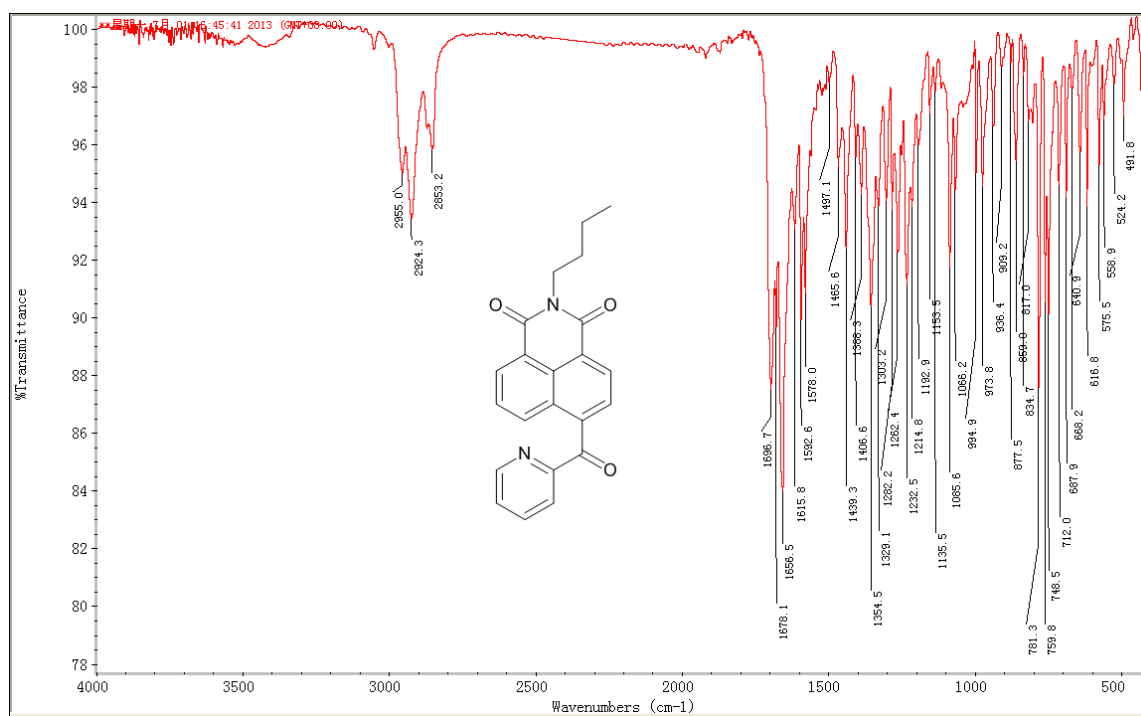

Figure S8. IR spectrum of compound 5

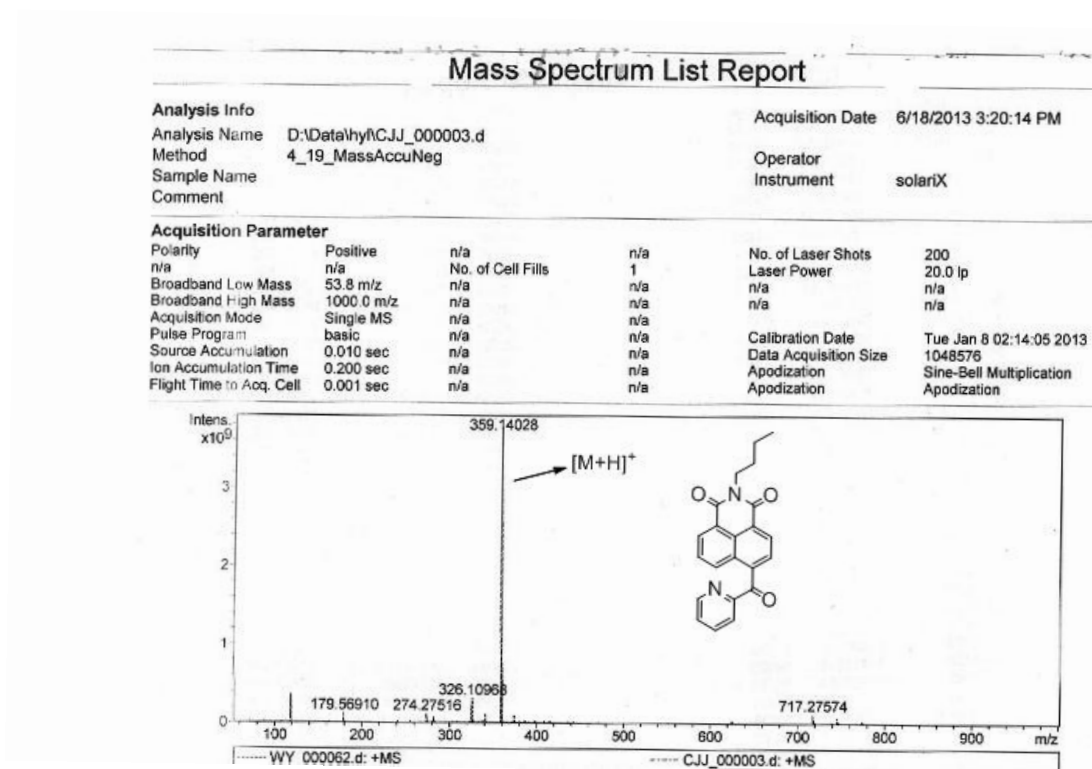

**Figure S9.** HRMS-ESI mass spectrum of compound **5**

# 6. UV-visible titration of compound **4** with $\text{AcO}^-$ in $\text{CH}_3\text{CN}$ .

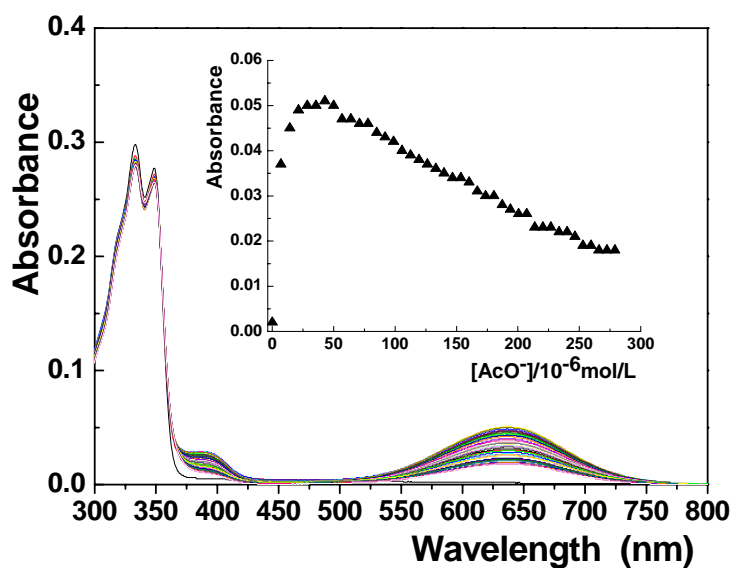

**Figure S10.** UV-visible titration of **4** (20  $\mu\text{M}$ ) with  $\text{Bu}_4\text{N}^+\text{AcO}^-$  in  $\text{CH}_3\text{CN}$ . The inset shows the absorbance at 637 nm as a function of  $[\text{AcO}^-]$ .

7. UV-visible titration of compound **4** with  $\text{H}_2\text{PO}_4^-$  in  $\text{CH}_3\text{CN}$

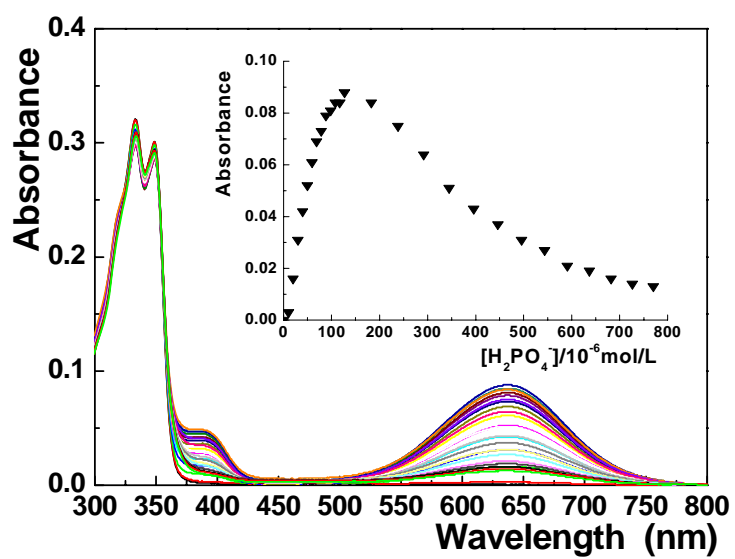

**Figure S11.** UV-visible titration of **4** (20  $\mu\text{M}$ ) with  $\text{Bu}_4\text{N}^+\text{H}_2\text{PO}_4^-$  in  $\text{CH}_3\text{CN}$ . The inset shows the absorbance at 637 nm as a function of  $[\text{H}_2\text{PO}_4^-]$ .

8.The absorbance detection limit of the 4 with F<sup>-</sup> in CH<sub>3</sub>CN.

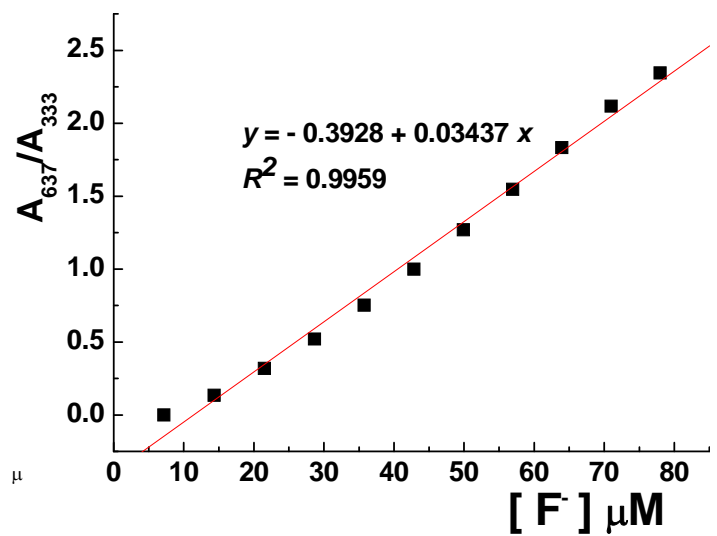

**Figure S12.** Absorbance intensity ratio (A<sub>637</sub>/A<sub>333</sub>) of dosimeter 4 (20 μM) as a function of F<sup>-</sup> concentration from 0- 80 μM (0 – 4.0 equivalents),

|           |               |         |
|-----------|---------------|---------|
| Equation  | Y = A + B * X |         |
| Parameter | Value         | Error   |
| A         | - 0.3928      | 0.05011 |
| B         | 0.03437       | 0.00104 |
|           |               |         |
| R         | SD            | N       |
| 0.99591   | 0.07712       | 11      |

The result of the analysis as follows:  
 Linear Equation: Y = - 0.3928 + 0.03437 \* X, R = 0.9959  
 S= 3.437 \* 10<sup>4</sup>, K = 3, δ = 0.07712  
 LOD = K \*δ / S = 6.73 μM

9. The standard 1:1 curve-fitting procedures for binding constants of  $\text{F}^-$ ,  $\text{AcO}^-$  and  $\text{H}_2\text{PO}_4^-$

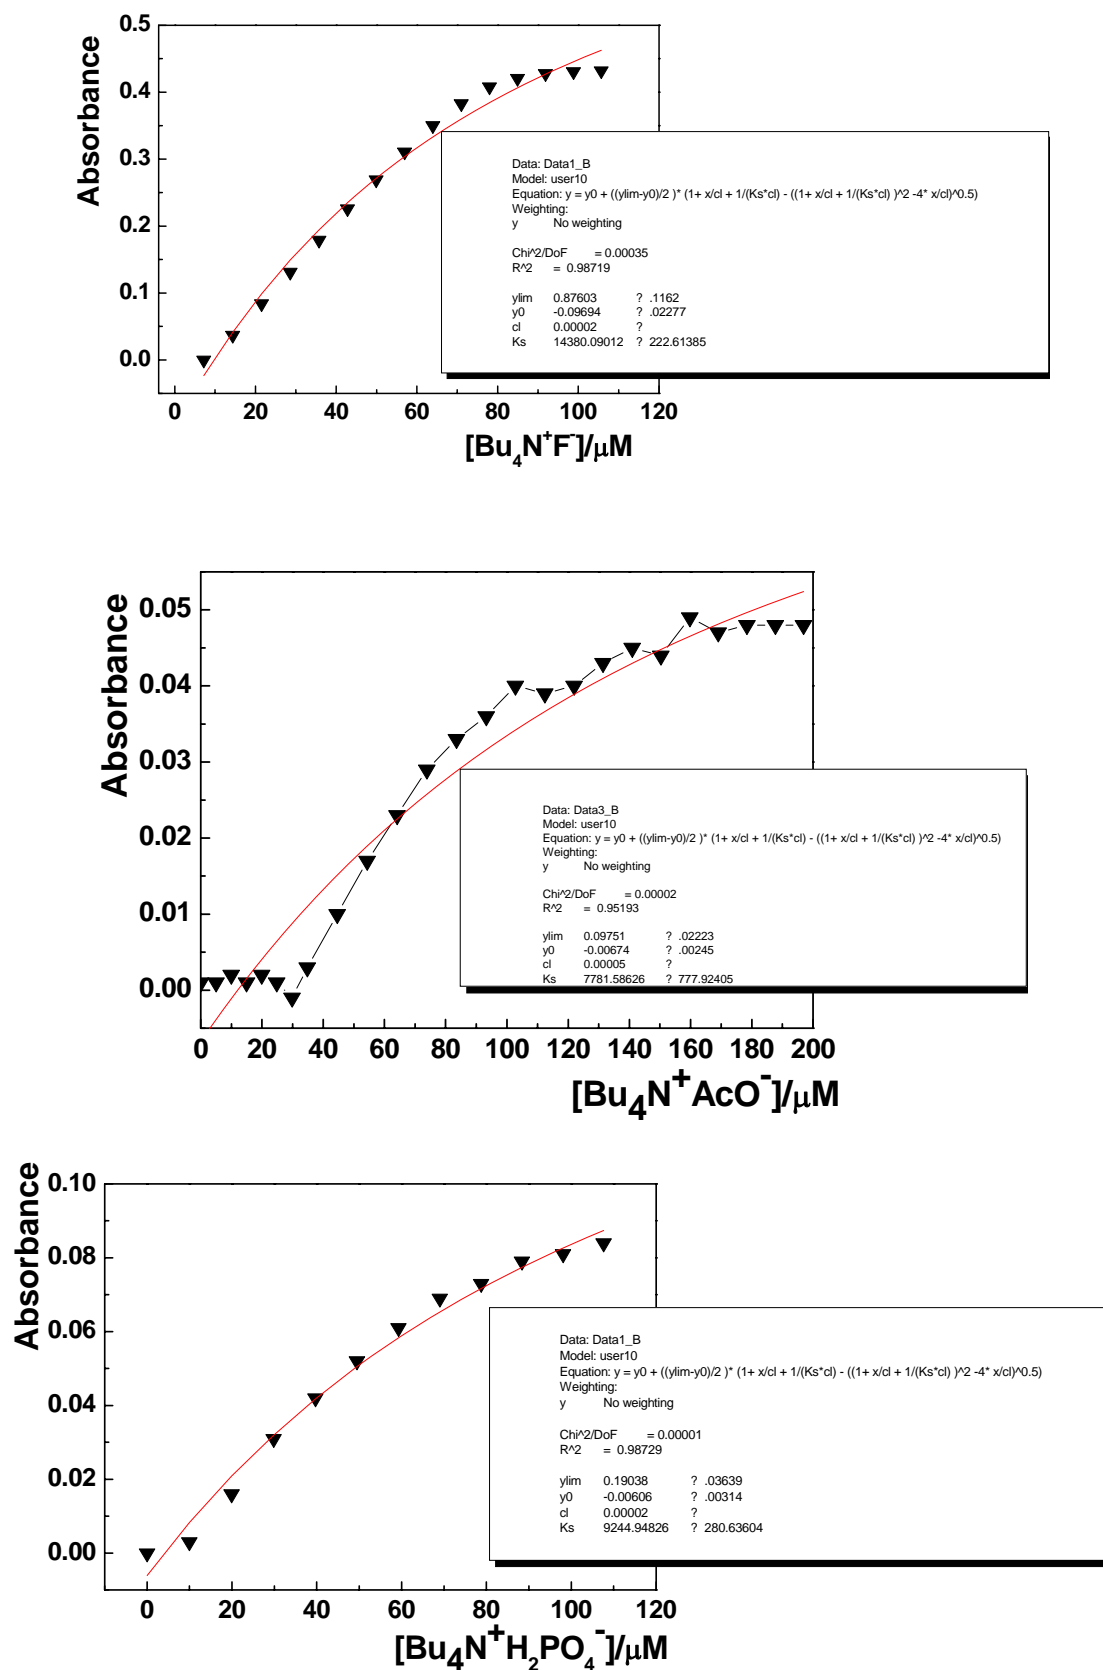

**Figure S13.** The binding constants for  $\text{F}^-$  (top),  $\text{AcO}^-$  (middle) and  $\text{H}_2\text{PO}_4^-$  (bottom) using the standard 1:1 curve-fitting procedures

### 10. Time-dependence UV-visible spectra of compound 4 with F<sup>-</sup>

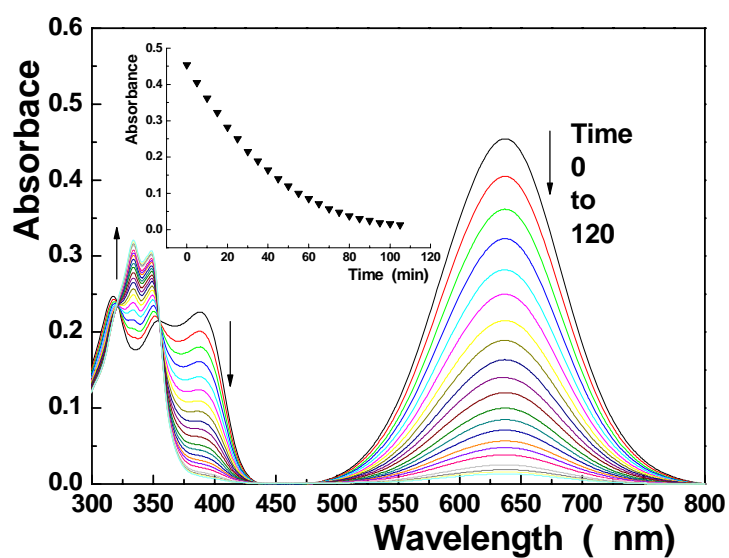

**Figure S14.** Time-dependence UV-visible spectra of 4 (20 μM) with F<sup>-</sup> (5.4 equiv.) Inset: plot of A<sub>637</sub> vs time.



# 11. UV-visible titration of compound 4 with F<sup>-</sup> in CH<sub>3</sub>CN

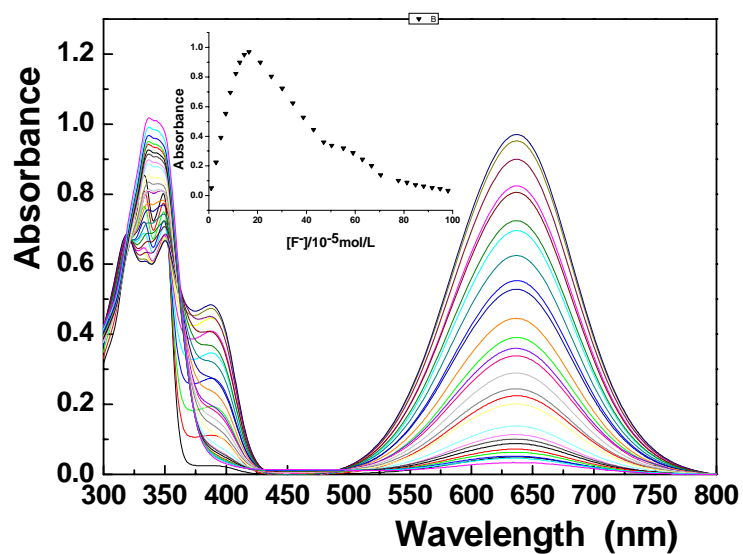

**Figure S15.** UV-visible titration of 4 (50 μM) with Bu<sub>4</sub>N<sup>+</sup>F<sup>-</sup> in CH<sub>3</sub>CN. The inset shows the absorbance at 637 nm as a function of [F<sup>-</sup>].

12. The final state of compound **4** with  $F^-$  and the UV-visible spectrum of compound **5**

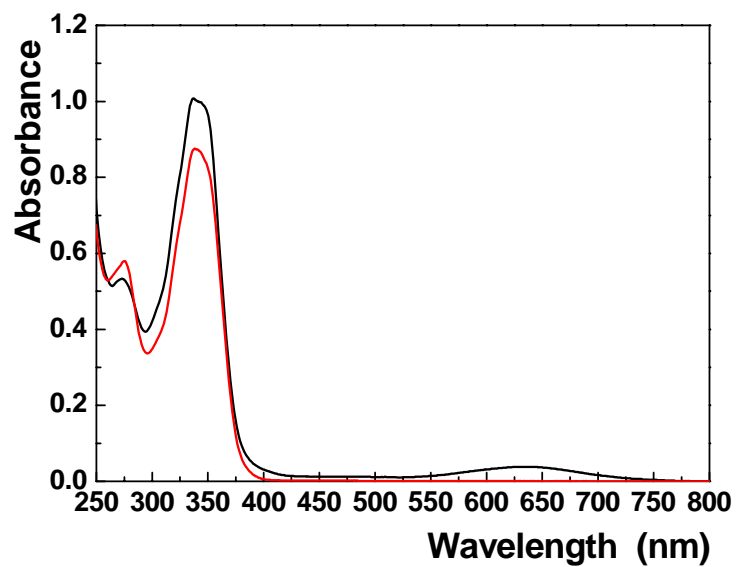

**Figure S16** . The final state of **4** (50  $\mu$ M, black) with  $Bu_4N^+F^-$  (20 equiv.) and the UV-visible spectrum of **5** (50  $\mu$ M, red)

### 13. UV-vis titration of compound 4 with OH<sup>-</sup> in CH<sub>3</sub>CN

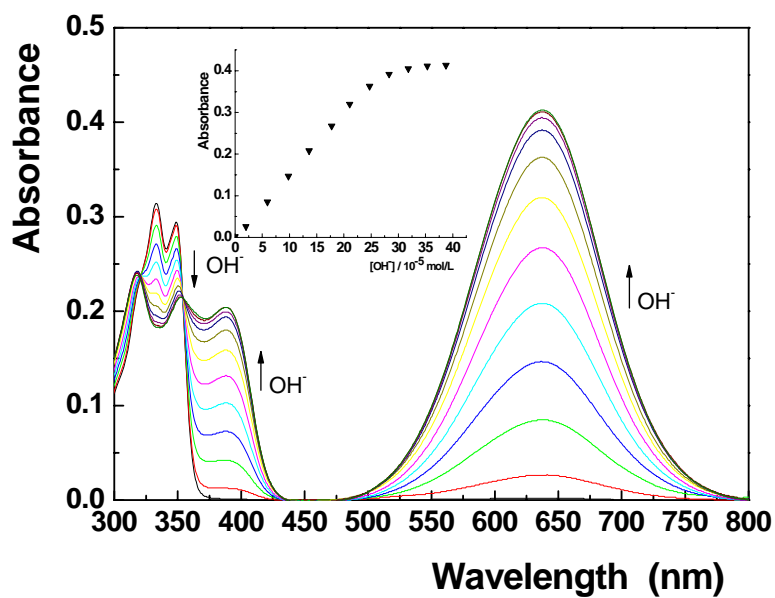

**Figure S17.** UV-visible titration of 4 (20 μM) with Bu<sub>4</sub>N<sup>+</sup>OH<sup>-</sup> (25% aq.) in CH<sub>3</sub>CN. Arrows show changes due to increasing concentration of OH<sup>-</sup> (500 μM). The inset shows the absorbance at 637 nm as a function of [OH<sup>-</sup>].

14. UV-visible titration of compound **4** with F<sup>-</sup> in mixture of solvent

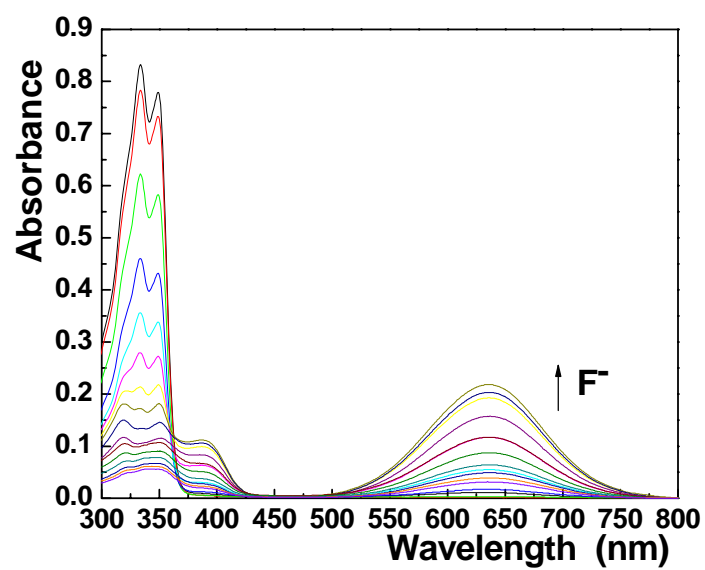

**Figure S18.** UV-visible titration of **4** (50  $\mu$ M) with Bu<sub>4</sub>N<sup>+</sup>F<sup>-</sup> in mixture of solvent (CH<sub>3</sub>CN: Water = 95: 5). Arrows show changes due to increasing concentration of F<sup>-</sup> (0-108 equiv).

### 15. Fluorescence titrations of compound 4 with $F^-$ in $CH_3CN$

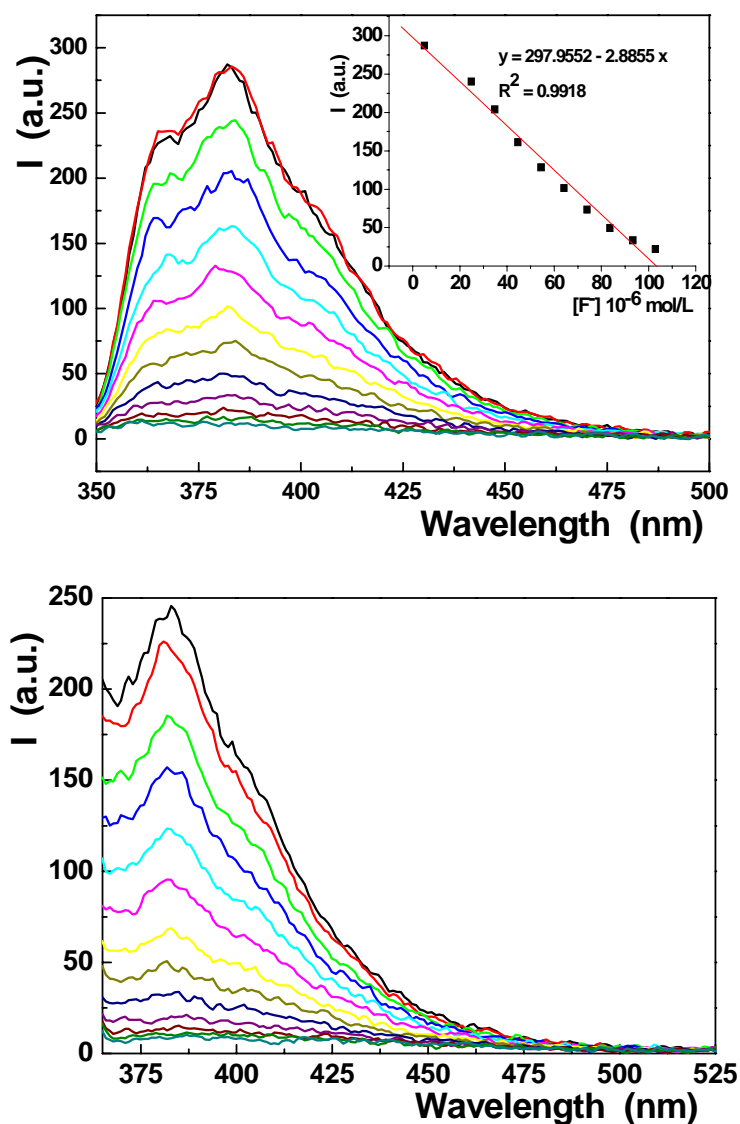

**Figure S19.** Emission spectra of **4** ( $20 \mu M$ ,  $\lambda_{ex} = 322$  nm (top),  $\lambda_{ex} = 353$  nm (bottom), in  $CH_3CN$ ) upon addition of increasing concentrations of  $F^-$  (as its TBA salt, 0 to 5.0 equiv). Inset: Plot of emission intensity ( $\lambda_{em} = 382$  nm) versus TBAF concentration.

S22
